# Supplementary material for: A Personal Breast Cancer Risk Stratification Model Using Common Variants and Environmental Risk Factors in Japanese Females
Source: MDPI journal article supplement (doi:10.3390/cancers13153796), 2021-07-28
Supplement: s1 [file s1]

Supplementary material

# A Personal Breast Cancer Risk Stratification Model Using Common Variants and Environmental Risk Factors in Japanese Females

Isao Oze, Hidemi Ito, Yumiko Kasugai, Taiki Yamaji, Yuko Kijima, Tomotaka Ugai, Yoshio Kasuga, Tomoyo K. Ouellette, Yukari Taniyama, Yuriko N. Koyanagi, Issei Imoto, Shoichiro Tsugane, Chihaya Koriyama, Motoki Iwasaki and Keitaro Matsuo

**Table S1.** List of breast cancer-associated SNPs reported in GWAS studies.

| SNP        | Chr  | Region  | Position  | Reference /Risk Allele | Gene                      |
|------------|------|---------|-----------|------------------------|---------------------------|
| rs11249433 | chr1 | 1p11.2  | 121538815 | C/T                    | EMBP1                     |
| rs11552449 | chr1 | 1p13.2  | 113905767 | C/T                    | DCLRE1B                   |
| rs616488   | chr1 | 1p36.22 | 10506158  | C/T                    | PEX14                     |
| rs12405132 | chr1 | 1q21.1  | 145790097 | C/T                    | RNF115                    |
| rs12048493 | chr1 | 1q21.2  | 149955122 | A/C                    | OTUD7B                    |
| rs6678914  | chr1 | 1q32.1  | 202218048 | A/G                    | LGR6                      |
| rs4245739  | chr1 | 1q32.1  | 204549714 | A/C                    | MDM4                      |
| rs72755295 | chr1 | 1q43    | 241870961 | A/A                    | EXO1                      |
| rs12710696 | chr2 | 2p24.1  | 19121042  | C/T                    | LINC01376                 |
| rs4849887  | chr2 | 2q14.2  | 120487546 | C/T                    | LINC01101 -<br>AC073257.2 |
| rs1550623  | chr2 | 2q31.1  | 173348166 | C/T                    | CDCA7                     |
| rs2016394  | chr2 | 2q31.1  | 172108243 | C/T                    | DLX2-DT                   |
| rs1045485  | chr2 | 2q33.1  | 201284866 | G/G                    | CASP8                     |
| rs10931936 | chr2 | 2q33.1  | 201279205 | T/C                    | CASP8                     |
| rs16857609 | chr2 | 2q35    | 217431785 | C/T                    | DIRC3                     |
| rs13387042 | chr2 | 2q35    | 217041109 | A/G                    | AC007749.1 -<br>RN7SKP43  |
| rs1053338  | chr3 | 3p14.1  | 63982224  | A/G                    | ATXN7                     |
| rs6796502  | chr3 | 3p21.31 | 46825376  | A/G                    | PRSS50 - PRSS42           |
| rs4973768  | chr3 | 3p24.1  | 27374522  | C/T                    | SLC4A7                    |
| rs12493607 | chr3 | 3p24.1  | 30641447  | C/G                    | TGFB2                     |

|            |      |         |           |     |                            |
|------------|------|---------|-----------|-----|----------------------------|
| rs6762644  | chr3 | 3p26.1  | 4700592   | A/G | ITPR1                      |
| rs9790517  | chr4 | 4q24    | 105163621 | C/T | TET2                       |
| rs6828523  | chr4 | 4q34.1  | 174925275 | A/C | ADAM29                     |
| rs7697216  | chr4 | 4q34.1  | 174906885 | C/T | intergenic                 |
| rs10941679 | chr5 | 5p12    | 44706396  | A/G | AC093292.1 -<br>RN7SL383P  |
| rs7716600  | chr5 | 5p12    | 44874903  | A/C | MRPS30                     |
| rs9790879  | chr5 | 5p12    | 44899783  | C/T | intergenic                 |
| rs2012709  | chr5 | 5p13.3  | 32567626  | C/T | SUB1                       |
| rs13162653 | chr5 | 5p15.1  | 16187419  | G/T | AC092335.1 - NACAP6        |
| rs2736108  | chr5 | 5p15.33 | 1297373   | A/G | TERT - MIR4457             |
| rs10069690 | chr5 | 5p15.33 | 1279675   | C/T | TERT                       |
| rs7726159  | chr5 | 5p15.33 | 1282204   | A/C | TERT                       |
| rs889312   | chr5 | 5q11.2  | 56736057  | A/C | MAP3K1                     |
| rs1353747  | chr5 | 5q11.2  | 59041654  | T/T | PDE4D                      |
| rs10472076 | chr5 | 5q11.2  | 58888234  | C/T | RAB3C                      |
| rs7707921  | chr5 | 5q14.2  | 82242227  | A/T | ATG10                      |
| rs1432679  | chr5 | 5q33.3  | 158817075 | C/T | EBF1                       |
| rs9257408  | chr6 | 6p22.1  | 28958443  | G/G | LINC01556 - KRT18P1        |
| rs204247   | chr6 | 6p23    | 13722291  | A/G | RANBP9                     |
| rs11242675 | chr6 | 6p25.3  | 1318643   | C/T | FOXQ1                      |
| rs17529111 | chr6 | 6q14.1  | 81418669  | C/T | AL590824.1 - TENT5A        |
| rs2180341  | chr6 | 6q22.33 | 127279485 | A/G | RNF146                     |
| rs3757318  | chr6 | 6q25.1  | 151592978 | A/G | CCDC170                    |
| rs2046210  | chr6 | 6q25.1  | 151627231 | T/C | CCDC171                    |
| rs12662670 | chr6 | 6q25.1  | 151597721 | G/T | CCDC170                    |
| rs9485370  | chr6 | 6q25.1  | 149285665 | G/T | TAB2                       |
| rs6964587  | chr7 | 7q21.2  | 92001306  | G/T | AKAP9                      |
| rs4593472  | chr7 | 7q32.3  | 130982362 | C/T | LINC-PINT,<br>AC016831.7   |
| rs720475   | chr7 | 7q35    | 144377836 | A/G | ARHGEF5                    |
| rs13365225 | chr8 | 8p11.23 | 37000965  | A/G | AC090453.1 -<br>AC092818.1 |
| rs9693444  | chr8 | 8p12    | 29652100  | A/C | RPL17P33 - LINC00589       |
| rs2943559  | chr8 | 8q21.13 | 75505702  | A/G | HNF4G                      |
| rs6472903  | chr8 | 8q21.13 | 75318066  | G/T | CASC9                      |
| rs13267382 | chr8 | 8q23.3  | 116197325 | A/G | LINC00536                  |
| rs13281615 | chr8 | 8q24.21 | 127343372 | G/A | CASC8, POU5F1B,<br>PCAT1   |

|            |       |          |           |     |                                               |
|------------|-------|----------|-----------|-----|-----------------------------------------------|
| rs11780156 | chr8  | 8q24.21  | 128182395 | C/T | MYC, MIR1208                                  |
| rs1011970  | chr9  | 9p21.3   | 22062135  | G/T | CDKN2A, CDKN2B                                |
| rs10759243 | chr9  | 9q31.2   | 107543834 | A/C | PPIAP88 - RNU6-996P                           |
| rs865686   | chr9  | 9q31.2   | 108126198 | G/T | KLF4, ACTL7A,<br>RAD23B                       |
| rs11814448 | chr10 | 10p12.31 | 22026914  | A/C | DNAJC1                                        |
| rs7072776  | chr10 | 10p12.31 | 21744013  | A/G | DNAJC1, MLLT10                                |
| rs2380205  | chr10 | 10p15.1  | 5844771   | C/T | ANKRD16, FBXO18                               |
| rs10822013 | chr10 | 10q21.2  | 62492218  | C/T | ZNF365                                        |
| rs10995190 | chr10 | 10q21.2  | 62518923  | A/G | ZNF365                                        |
| rs704010   | chr10 | 10q22.3  | 79081391  | A/G | ZMIZ1                                         |
| rs7904519  | chr10 | 10q25.2  | 113014168 | A/G | TCF7L2                                        |
| rs11199914 | chr10 | 10q26.12 | 121334387 | C/T | LINC01153 -<br>RN7SKP167                      |
| rs11200014 | chr10 | 10q26.13 | 121575416 | A/G | FGFR2                                         |
| rs1219648  | chr10 | 10q26.13 | 121586676 | A/G | FGFR2                                         |
| rs2420946  | chr10 | 10q26.13 | 121591810 | C/T | FGFR2                                         |
| rs2981578  | chr10 | 10q26.13 | 121580797 | A/G | FGFR2                                         |
| rs2981579  | chr10 | 10q26.13 | 121577821 | G/A | FGFR2                                         |
| rs2981582  | chr10 | 10q26.13 | 121592803 | C/T | FGFR2                                         |
| rs3817198  | chr11 | 11p15.5  | 1887776   | C/T | LSP1                                          |
| rs3903072  | chr11 | 11q13.1  | 65815595  | A/C | DKFZp761E198,<br>OVOL1, SNX32, CFL1,<br>MUS81 |
| rs614367   | chr11 | 11q13.3  | 69513996  | C/T | FGF3, MYEOV, CCND1,<br>ORAOV1, FGF19, FGF4    |
| rs554219   | chr11 | 11q13.3  | 69516874  | C/G | LINC01488 - CCND1                             |
| rs75915166 | chr11 | 11q13.3  | 69564393  | A/C | LINC01488 - CCND1                             |
| rs78540526 | chr11 | 11q13.3  | 69516650  | C/T | LINC01488 - CCND1                             |
| rs11820646 | chr11 | 11q24.3  | 129591276 | C/T | RPS27P20 - AP003500.2                         |
| rs7107217  | chr11 | 11q24.3  | 129603795 | A/C | TMEM45B, BARX2                                |
| rs10771399 | chr12 | 12p11.22 | 28002147  | A/G | PTHLH                                         |
| rs12422552 | chr12 | 12p13.1  | 14260997  | C/G | GNAI2P1 - RPL30P11                            |
| rs17356907 | chr12 | 12q22    | 95633983  | A/G | NTN4                                          |
| rs1292011  | chr12 | 12q24.21 | 115398717 | C/T | AC078880.2 -<br>AC009803.2                    |
| rs11571833 | chr13 | 13q13.1  | 32398489  | A/A | BRCA2                                         |
| rs2236007  | chr14 | 14q13.3  | 36663564  | A/G | PAX9                                          |
| rs8009944  | chr14 | 14q24.1  | 68572871  | A/C | RAD51B                                        |

|            |       |          |          |     |                            |
|------------|-------|----------|----------|-----|----------------------------|
| rs2588809  | chr14 | 14q24.1  | 68193711 | C/T | RAD51L1                    |
| rs999737   | chr14 | 14q24.1  | 68567965 | C/T | RAD51L1                    |
| rs941764   | chr14 | 14q32.11 | 91374725 | A/G | CCDC88C                    |
| rs11627032 | chr14 | 14q32.12 | 92637727 | C/T | RIN3                       |
| rs3803662  | chr16 | 16q12.1  | 52552429 | C/T | TNRC9, LOC643714           |
| rs12443621 | chr16 | 16q12.1  | 52514125 | A/G | TOX3                       |
| rs17271951 | chr16 | 16q12.1  | 52504128 | C/T | TOX3                       |
| rs8051542  | chr16 | 16q12.1  | 52500255 | C/T | TOX3                       |
| rs4784227  | chr16 | 16q12.1  | 52565276 | T/C | TOX3                       |
| rs11075995 | chr16 | 16q12.2  | 53821379 | A/T | FTO                        |
| rs17817449 | chr16 | 16q12.2  | 53779455 | G/T | FTO                        |
| rs13329835 | chr16 | 16q23.2  | 80616908 | A/G | CDYL2                      |
| rs6504950  | chr17 | 17q22    | 54979110 | A/G | COX11                      |
| rs1156287  | chr17 | 17q22    | 54999438 | C/T | STXBP4                     |
| rs745570   | chr17 | 17q25.3  | 79807926 | C/T | AC100791.2 -<br>LINC01977  |
| rs1436904  | chr18 | 18q11.2  | 26990703 | G/T | CHST9                      |
| rs527616   | chr18 | 18q11.2  | 26757460 | C/G | AQP4-AS1                   |
| rs6507583  | chr18 | 18q12.3  | 44819625 | A/G | SETBP1                     |
| rs8170     | chr19 | 19p13.11 | 17278895 | C/C | ANKLE1, C19orf62,<br>ABHD8 |
| rs2363956  | chr19 | 19p13.11 | 17283315 | G/T | ANKLE1                     |
| rs4808801  | chr19 | 19p13.11 | 18460331 | A/G | ELL                        |
| rs3760982  | chr19 | 19q13.31 | 43782361 | A/G | KCNN4 - LYPD5              |
| rs2823093  | chr21 | 21q21.1  | 15148511 | A/G | NRIP1                      |
| rs17879961 | chr22 | 22q12.1  | 28725099 | T/T | CHEK2                      |
| rs132390   | chr22 | 22q12.2  | 29225488 | T/T | EMID1                      |
| rs6001930  | chr22 | 22q13.1  | 40480230 | C/T | MKL1                       |

**Table S2.** ORs of genetic risk groups stratified by menopausal status.

|               |       |          | Crude model* |        |       |                        |                        | Adjusted model** |        |       |                        |                        |
|---------------|-------|----------|--------------|--------|-------|------------------------|------------------------|------------------|--------|-------|------------------------|------------------------|
| Risk group    | Cases | Controls | OR           | 95% CI |       | p-value                | trend p                | OR               | 95% CI |       | p-value                | trend p                |
| Premenopause  |       |          |              |        |       |                        |                        |                  |        |       |                        |                        |
| Low***        | 78    | 254      | Reference    |        |       |                        | 2.47x10 <sup>-11</sup> | Reference        |        |       |                        | 1.47x10 <sup>-11</sup> |
| Moderate***   | 429   | 704      | 1.97         | (1.49- | 2.62) | 2.77x10 <sup>-6</sup>  |                        | 2.03             | (1.52- | 2.72) | 1.86x10 <sup>-6</sup>  |                        |
| High***       | 84    | 65       | 4.05         | (2.67- | 6.15) | 5.13x10 <sup>-11</sup> |                        | 4.27             | (2.78- | 6.56) | 3.22x10 <sup>-11</sup> |                        |
| Postmenopause |       |          |              |        |       |                        |                        |                  |        |       |                        |                        |
| Low***        | 110   | 245      | Reference    |        |       |                        | 3.36x10 <sup>-7</sup>  | Reference        |        |       |                        | 7.66x10 <sup>-7</sup>  |
| Moderate***   | 502   | 754      | 1.46         | (1.13- | 1.88) | 3.60x10 <sup>-3</sup>  |                        | 1.46             | (1.13- | 1.90) | 4.14x10 <sup>-3</sup>  |                        |
| High***       | 99    | 80       | 2.72         | (1.87- | 3.96) | 1.66x10 <sup>-7</sup>  |                        | 2.69             | (1.83- | 3.95) | 4.23x10 <sup>-7</sup>  |                        |

OR; odds ratio, CI; confidence interval

\* Age was included in the crude model.

\*\* Age, BMI, ethanol intake, smoking, physical activity, family history of breast cancer, age at menarche, parity, number of births, age at first birth, breastfeeding and hormone therapy were included in the adjusted model.

\*\*\*Genetic risk group was defined by number of risk alleles. Number of risk alleles of 0-10, 11-16 and 17-28 were defined as low, moderate and high risk group, respectively.

**Table 3.** C-statistics of genetic, environmental and inclusive risk models stratified by menopausal status.

| Menopausal status | Genetic      |        |         | Environment  |        |         | Inclusive    |        |         | p-value               |
|-------------------|--------------|--------|---------|--------------|--------|---------|--------------|--------|---------|-----------------------|
|                   | C-statistics | 95%    | CI      | C-statistics | 95%    | CI      | C-statistics | 95%    | CI      |                       |
| Premenopause      | 0.652        | (0.625 | -0.680) | 0.611        | (0.582 | -0.640) | 0.677        | (0.650 | -0.704) | 5.53x10 <sup>-8</sup> |
| Postmenopause     | 0.621        | (0.594 | -0.647) | 0.625        | (0.598 | -0.651) | 0.663        | (0.638 | -0.689) | 1.44x10 <sup>-5</sup> |

Genetic risk group was included in the Genetic model.

Age, BMI, ethanol intake, smoking, physical activity, family history of breast cancer, age at menarche, parity, number of births, age at first birth, breastfeeding and hormone therapy were included in the Environment model.

All variables in Genetic model and Environment model were included in the Inclusive model.

p-values were calculated by testing differences between the Environment model and Inclusive model.

**Table 4.** C-statistics of genetic risk score models including 14, 22 and 42 SNPs.

| No. of SNPs<br>included in risk<br>score models | Pooled       |         |        | Nagano       |         |        | Kagoshima    |         |        | Aichi        |         |        |
|-------------------------------------------------|--------------|---------|--------|--------------|---------|--------|--------------|---------|--------|--------------|---------|--------|
|                                                 | C-statistics | 95%     | CI     |
| 14 SNPs                                         | 0.633        | (0.614- | 0.652) | 0.605        | (0.566- | 0.645) | 0.609        | (0.560- | 0.657) | 0.604        | (0.579- | 0.630) |
| 22 SNPs                                         | 0.636        | (0.617- | 0.655) | 0.602        | (0.562- | 0.642) | 0.644        | (0.597- | 0.690) | 0.601        | (0.576- | 0.627) |
| 42 SNPs                                         | 0.636        | (0.617- | 0.655) | 0.610        | (0.570- | 0.650) | 0.648        | (0.601- | 0.694) | 0.593        | (0.567- | 0.618) |
| p-value*                                        | 0.772        |         |        | 0.861        |         |        | 0.159        |         |        | 0.688        |         |        |

\*P-values were calculated comparing c-statistics of three genetic risk models.

Table S5. C-statistics of three levels of genetic risk score model, risk score model and allelic risk model.

| Risk model                             | Pooled       |         |        | Nagano       |         |        | Kagoshima    |         |        | Aichi        |         |        |
|----------------------------------------|--------------|---------|--------|--------------|---------|--------|--------------|---------|--------|--------------|---------|--------|
|                                        | C-statistics | 0.95    | CI     |
| Risk score model in 3 levels           | 0.614        | (0.595- | 0.632) | 0.560        | (0.527- | 0.593) | 0.570        | (0.529- | 0.610) | 0.572        | (0.551- | 0.593) |
| Risk score model                       | 0.633        | (0.614- | 0.652) | 0.605        | (0.566- | 0.645) | 0.609        | (0.560- | 0.657) | 0.604        | (0.579- | 0.630) |
| Allelic risk model                     | 0.639        | (0.620- | 0.658) | 0.636        | (0.598- | 0.675) | 0.636        | (0.590- | 0.683) | 0.614        | (0.589- | 0.640) |
| Risk score model vs allelic risk model | p=0.202      |         |        | p=0.150      |         |        | p=0.268      |         |        | p=0.187      |         |        |

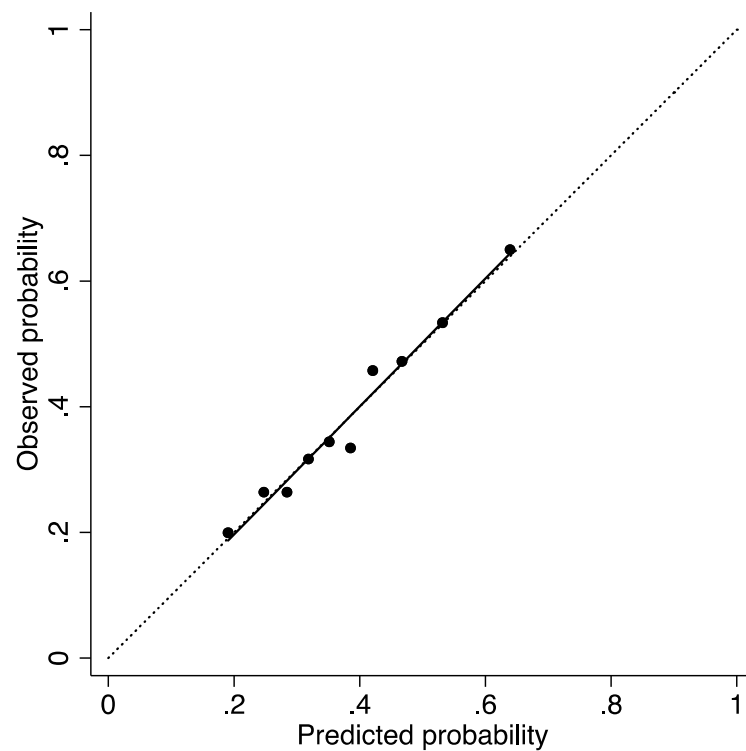

**Figure S1.** Calibration plot of inclusive model in the total population. Predicted and observed probabilities within deciles of predicted probability were plotted. Dotted line represents the ideal calibration line and the solid line shows the linear calibration line for the risk model.
